# Supplementary material
Source: HighWire-hosted journal article supplement (https://molpharm.aspetjournals.org/highwire/filestream/76786/field_highwire_adjunct_files/3/Supplementary_Table_S2.pdf)
Supplement: Supplementary_Table_S2.pdf [file Supplementary_Table_S2.pdf]

## Identification of Survival Genes in Human Glioblastoma Cells Using siRNA Screening

Nikhil G Thaker, Fang Zhang, Peter R. McDonald, Tong Ying Shun, Michael D Lewen, Ian F. Pollack, and John S. Lazo

Molecular Pharmacology

Supplementary  
Table S2  
Genes identified as  
reproducibly  
essential genes for  
glioma cell viability  
using the MAD  
method

| Gene Symbol | Full Gene Name                                                                                                | Accession No | Percent viability (%) |
|-------------|---------------------------------------------------------------------------------------------------------------|--------------|-----------------------|
| RAN         | RAN, member RAS oncogene family                                                                               | NM_006325    | 5.84                  |
| DDX39       | DEAD (Asp-Glu-Ala-Asp) box polypeptide 39                                                                     | NM_138998    | 6.90                  |
| K-ALPHA-1   | K-ALPHA-1                                                                                                     | NM_006082    | 8.22                  |
| PSMC3       | proteasome (prosome, macropain) 26S subunit, ATPase, 3                                                        | NM_002804    | 8.35                  |
| POLR2F      | polymerase (RNA) II (DNA directed) polypeptide F                                                              | NM_021974    | 9.66                  |
| PSMD14      | proteasome (prosome, macropain) 26S subunit, non-ATPase, 14                                                   | NM_005805    | 10.90                 |
| SIAT7E      | ST6 (alpha-N-acetyl-neuraminyl-2,3-beta-galactosyl-1,3)-N-acetylgalactosaminide alpha-2,6-sialyltransferase 5 | NM_030965    | 11.16                 |
| SPINK1      | serine protease inhibitor, Kazal type 1                                                                       | NM_003122    | 11.19                 |
| SIAT4B      | ST3 beta-galactoside alpha-2,3-sialyltransferase 2                                                            | NM_006927    | 11.25                 |
| BTN2A3      | butyrophilin, subfamily 2, member A3                                                                          | NM_024018    | 11.45                 |
| SPTLC1      | serine palmitoyltransferase, long chain base subunit 1                                                        | NM_178324    | 11.66                 |
| PSMC6       | proteasome (prosome, macropain) 26S subunit, ATPase, 6                                                        | NM_002806    | 12.17                 |
| HLCS        | holocarboxylase synthetase (biotin-[propionyl-Coenzyme A-carboxylase (ATP-hydrolysing)] ligase)               | NM_000411    | 12.48                 |
| TUBGCP6     | tubulin, gamma complex associated protein 6                                                                   | NM_020461    | 13.45                 |
| BUB1B       | BUB1 budding uninhibited by benzimidazoles 1 homolog beta (yeast)                                             | NM_001211    | 13.49                 |
| GRHPR       | glyoxylate reductase/hydroxypyruvate reductase                                                                | NM_012203    | 14.21                 |
| TLR2        | toll-like receptor 2                                                                                          | NM_003264    | 15.52                 |
| PRKCD       | protein kinase C, delta                                                                                       | NM_006254    | 15.55                 |
| CHN1        | chimerin (chimaerin) 1                                                                                        | NM_001025201 | 15.67                 |

## Identification of Survival Genes in Human Glioblastoma Cells Using siRNA Screening

Nikhil G Thaker, Fang Zhang, Peter R. McDonald, Tong Ying Shun, Michael D Lewen, Ian F. Pollack, and John S. Lazo

### Molecular Pharmacology

|               |                                                                                |           |       |
|---------------|--------------------------------------------------------------------------------|-----------|-------|
| AKT3          | v-akt murine thymoma viral oncogene homolog 3 (protein kinase B, gamma)        | NM_181690 | 16.28 |
| PSMC5         | proteasome (prosome, macropain) 26S subunit, ATPase, 5                         | NM_002805 | 17.05 |
| SRCRB4D       | scavenger receptor cysteine rich domain containing, group B (4 domains)        | NM_080744 | 17.78 |
| UBL5          | ubiquitin-like 5                                                               | NM_024292 | 19.35 |
| ITGAV         | integrin, alpha V (vitronectin receptor, alpha polypeptide, antigen CD51)      | NM_002210 | 19.38 |
| POMT1         | protein-O-mannosyltransferase 1                                                | NM_007171 | 19.39 |
| IDH3B         | isocitrate dehydrogenase 3 (NAD+) beta                                         | NM_174856 | 19.42 |
| TNNI3K        | TNNI3 interacting kinase                                                       | NM_015978 | 20.08 |
| COX7A2        | cytochrome c oxidase subunit VIIa polypeptide 2 (liver)                        | NM_001865 | 20.23 |
| ZAP128        | ZAP128                                                                         | NM_006821 | 20.51 |
| ITGB3         | integrin, beta 3 (platelet glycoprotein IIIa, antigen CD61)                    | NM_000212 | 20.75 |
| PIGQ          | phosphatidylinositol glycan, class Q                                           | NM_148920 | 20.85 |
| CYB5R2        | CYB5R2                                                                         | NM_016229 | 21.18 |
| ITGA3         | integrin, alpha 3 (antigen CD49C, alpha 3 subunit of VLA-3 receptor)           | NM_002204 | 21.49 |
| GABRB2        | gamma-aminobutyric acid (GABA) A receptor, beta 2                              | NM_021911 | 21.53 |
| BST1          | bone marrow stromal cell antigen 1                                             | NM_004334 | 21.57 |
| RRM1          | ribonucleotide reductase M1 polypeptide                                        | NM_001033 | 21.76 |
| C11orf8       | chromosome 11 open reading frame 8                                             | NM_001584 | 21.87 |
| CLCN3         | chloride channel 3                                                             | NM_173872 | 22.20 |
| CHST3         | carbohydrate (chondroitin 6) sulfotransferase 3                                | NM_004273 | 22.31 |
| CARM1         | coactivator-associated arginine methyltransferase 1                            | NM_199141 | 22.40 |
| EP300         | E1A binding protein p300                                                       | NM_001429 | 22.40 |
| LOC144125     | olfactory receptor, family 2, subfamily AG, member 1                           | XM_090203 | 22.66 |
| DKFZP434L1717 | DKFZP434L1717                                                                  | NM_032136 | 22.66 |
| VCP           | valosin-containing protein                                                     | NM_007126 | 22.68 |
| GPX2          | glutathione peroxidase 2 (gastrointestinal)                                    | NM_002083 | 22.70 |
| SLC7A2        | solute carrier family 7 (cationic amino acid transporter, y+ system), member 2 | NM_003046 | 23.17 |

## Identification of Survival Genes in Human Glioblastoma Cells Using siRNA Screening

Nikhil G Thaker, Fang Zhang, Peter R. McDonald, Tong Ying Shun, Michael D Lewen, Ian F. Pollack, and John S. Lazo

### Molecular Pharmacology

|          |                                                                                                 |           |       |
|----------|-------------------------------------------------------------------------------------------------|-----------|-------|
| FCN3     | ficolin (collagen/fibrinogen domain containing) 3 (Hakata antigen)                              | NM_173452 | 23.74 |
| TLR4     | toll-like receptor 4                                                                            | NM_138557 | 23.93 |
| GUCY1A2  | guanylate cyclase 1, soluble, alpha 2                                                           | NM_000855 | 24.08 |
| RAB35    | RAB35, member RAS oncogene family                                                               | NM_006861 | 24.24 |
| SEC23B   | Sec23 homolog B ( <i>S. cerevisiae</i> )                                                        | NM_032985 | 24.47 |
| ARHGEF11 | Rho guanine nucleotide exchange factor (GEF) 11                                                 | NM_014784 | 24.52 |
| RHOT1    | ras homolog gene family, member T1                                                              | NM_018307 | 24.72 |
| POLR2A   | polymerase (RNA) II (DNA directed) polypeptide A, 220kDa                                        | NM_000937 | 24.82 |
| SMS      | spermine synthase                                                                               | NM_004595 | 24.90 |
| PSMD7    | proteasome (prosome, macropain) 26S subunit, non-ATPase, 7 (Mov34 homolog)                      | NM_002811 | 24.96 |
| KCNH7    | potassium voltage-gated channel, subfamily H (eag-related), member 7                            | NM_033272 | 25.04 |
| OAZ1     | ornithine decarboxylase antizyme 1                                                              | NM_004152 | 25.14 |
| GALNS    | galactosamine (N-acetyl)-6-sulfate sulfatase (Morquio syndrome, mucopolysaccharidosis type IVA) | NM_000512 | 25.30 |
| B3GNT7   | UDP-GlcNAc:betaGal beta-1,3-N-acetylglucosaminyltransferase 7                                   | NM_145236 | 25.52 |
| COQ6     | coenzyme Q6 homolog (yeast)                                                                     | NM_182476 | 25.53 |
| GABRB3   | gamma-aminobutyric acid (GABA) A receptor, beta 3                                               | NM_000814 | 25.94 |
| AGPAT4   | 1-acylglycerol-3-phosphate O-acyltransferase 4 (lysophosphatidic acid acyltransferase, delta)   | NM_020133 | 25.97 |
| ALOX15B  | arachidonate 15-lipoxygenase, second type                                                       | NM_001141 | 26.00 |
| RABGGTA  | Rab geranylgeranyltransferase, alpha subunit                                                    | NM_182836 | 26.01 |
| MPHOSPH1 | M-phase phosphoprotein 1                                                                        | NM_016195 | 26.04 |
| B3GNT6   | UDP-GlcNAc:betaGal beta-1,3-N-acetylglucosaminyltransferase 6                                   | NM_006876 | 26.04 |
| DCT      | dopachrome tautomerase (dopachrome delta-isomerase, tyrosine-related protein 2)                 | NM_001922 | 26.05 |
| BGLAP    | bone gamma-carboxyglutamate (gla) protein (osteocalcin)                                         | NM_199173 | 26.35 |
| DDX1     | DEAD (Asp-Glu-Ala-Asp) box polypeptide 1                                                        | NM_004939 | 26.35 |
| PSMC4    | proteasome (prosome, macropain) 26S subunit, ATPase, 4                                          | NM_153001 | 26.43 |
| GRCC9    | GRCC9                                                                                           | NM_032641 | 26.60 |

## Identification of Survival Genes in Human Glioblastoma Cells Using siRNA Screening

Nikhil G Thaker, Fang Zhang, Peter R. McDonald, Tong Ying Shun, Michael D Lewen, Ian F. Pollack, and John S. Lazo

### Molecular Pharmacology

|          |                                                                                 |              |       |
|----------|---------------------------------------------------------------------------------|--------------|-------|
| PSMB2    | proteasome (prosome, macropain) subunit, beta type, 2                           | NM_002794    | 26.70 |
| ENTPD2   | ectonucleoside triphosphate diphosphohydrolase 2                                | NM_203468    | 26.83 |
| DNTT     | deoxynucleotidyltransferase, terminal                                           | NM_001017520 | 27.23 |
| HIBCH    | 3-hydroxyisobutyryl-Coenzyme A hydrolase                                        | NM_014362    | 27.53 |
| OR1D4    | olfactory receptor, family 1, subfamily D, member 4                             | NM_003552    | 27.57 |
| CGI-04   | tyrosyl-tRNA synthetase 2 (mitochondrial)                                       | NM_015936    | 27.61 |
| AGPS     | alkylglycerone phosphate synthase                                               | NM_003659    | 27.69 |
| SLC12A5  | solute carrier family 12, (potassium-chloride transporter) member 5             | NM_020708    | 27.79 |
| RYK      | RYK receptor-like tyrosine kinase                                               | NM_002958    | 28.17 |
| TOPORS   | topoisomerase I binding, arginine/serine-rich                                   | NM_005802    | 28.31 |
| RAB6A    | RAB6A, member RAS oncogene family                                               | NM_198896    | 28.35 |
| CDK5R2   | cyclin-dependent kinase 5, regulatory subunit 2 (p39)                           | NM_003936    | 28.45 |
| SORCS3   | sortilin-related VPS10 domain containing receptor 3                             | NM_014978    | 28.46 |
| RPE      | ribulose-5-phosphate-3-epimerase                                                | NM_199229    | 28.79 |
| GRIN1    | glutamate receptor, ionotropic, N-methyl D-aspartate 1                          | NM_007327    | 29.05 |
| GCNT3    | glucosaminyl (N-acetyl) transferase 3, mucin type                               | NM_004751    | 29.23 |
| CKS1B    | CDC28 protein kinase regulatory subunit 1B                                      | NM_001826    | 29.49 |
| RAB40C   | RAB40C, member RAS oncogene family                                              | NM_021168    | 29.55 |
| SLC25A19 | solute carrier family 25 (mitochondrial deoxynucleotide carrier), member 19     | NM_021734    | 29.63 |
| RAB40B   | RAB40B, member RAS oncogene family                                              | NM_006822    | 29.68 |
| LOC57168 | LOC57168                                                                        | NM_020437    | 29.73 |
| B4GALT3  | UDP-Gal:betaGlcNAc beta 1,4-galactosyltransferase, polypeptide 3                | NM_003779    | 29.78 |
| SOD1     | superoxide dismutase 1, soluble (amyotrophic lateral sclerosis 1 (adult))       | NM_000454    | 29.90 |
| GUSB     | glucuronidase, beta                                                             | NM_000181    | 29.93 |
| KIR2DL3  | killer cell immunoglobulin-like receptor, two domains, long cytoplasmic tail, 3 | NM_015868    | 29.97 |
| GOSR1    | golgi SNAP receptor complex member 1                                            | NM_004871    | 29.97 |
| MGST2    | microsomal glutathione S-transferase 2                                          | NM_002413    | 30.19 |

## Identification of Survival Genes in Human Glioblastoma Cells Using siRNA Screening

Nikhil G Thaker, Fang Zhang, Peter R. McDonald, Tong Ying Shun, Michael D Lewen, Ian F. Pollack, and John S. Lazo

### Molecular Pharmacology

|         |                                                                                                                       |              |       |
|---------|-----------------------------------------------------------------------------------------------------------------------|--------------|-------|
| POLE3   | polymerase (DNA directed), epsilon 3 (p17 subunit)                                                                    | NM_017443    | 30.41 |
| PKD1L3  | polycystic kidney disease 1-like 3                                                                                    | NM_181536    | 30.47 |
| PSMB4   | proteasome (prosome, macropain) subunit, beta type, 4                                                                 | NM_002796    | 30.56 |
| PSMA6   | proteasome (prosome, macropain) subunit, alpha type, 6                                                                | NM_002791    | 30.62 |
| POLR2G  | polymerase (RNA) II (DNA directed) polypeptide G                                                                      | NM_002696    | 30.81 |
| UBE2V2  | ubiquitin-conjugating enzyme E2 variant 2                                                                             | NM_003350    | 30.87 |
| TST     | thiosulfate sulfurtransferase (rhodanese)                                                                             | NM_003312    | 30.97 |
| UBE2D2  | ubiquitin-conjugating enzyme E2D 2 (UBC4/5 homolog, yeast)                                                            | NM_003339    | 31.06 |
| SIAT10  | ST3 beta-galactoside alpha-2,3-sialyltransferase 6                                                                    | NM_006100    | 31.16 |
| UNC119  | unc-119 homolog (C. elegans)                                                                                          | NM_054035    | 31.27 |
| GALNT12 | UDP-N-acetyl-alpha-D-galactosamine:polypeptide N-acetylgalactosaminyltransferase 12 (GalNAc-T12)                      | NM_024642    | 31.32 |
| UROD    | uroporphyrinogen decarboxylase                                                                                        | NM_000374    | 31.49 |
| CTSS    | cathepsin S                                                                                                           | NM_004079    | 31.55 |
| PSMA4   | proteasome (prosome, macropain) subunit, alpha type, 4                                                                | NM_002789    | 31.58 |
| ADAR    | adenosine deaminase, RNA-specific                                                                                     | NM_001111    | 31.95 |
| APP     | amyloid beta (A4) precursor protein (protease nexin-II, Alzheimer disease)                                            | NM_201414    | 32.08 |
| BPHL    | biphenyl hydrolase-like (serine hydrolase; breast epithelial mucin-associated antigen)                                | NM_004332    | 32.20 |
| CYP1B1  | cytochrome P450, family 1, subfamily B, polypeptide 1                                                                 | NM_000104    | 32.29 |
| TXNRD1  | thioredoxin reductase 1                                                                                               | NM_182729    | 32.30 |
| SENP2   | SUMO1/sentrin/SMT3 specific protease 2                                                                                | NM_021627    | 32.61 |
| PSMA3   | proteasome (prosome, macropain) subunit, alpha type, 3                                                                | NM_152132    | 33.00 |
| RERG    | RAS-like, estrogen-regulated, growth inhibitor                                                                        | NM_032918    | 33.02 |
| AGXT    | alanine-glyoxylate aminotransferase (oxalosis I; hyperoxaluria I; glycolicaciduria; serine-pyruvate aminotransferase) | NM_000030    | 33.06 |
| GRK4    | G protein-coupled receptor kinase 4                                                                                   | NM_001004056 | 33.22 |

## Identification of Survival Genes in Human Glioblastoma Cells Using siRNA Screening

Nikhil G Thaker, Fang Zhang, Peter R. McDonald, Tong Ying Shun, Michael D Lewen, Ian F. Pollack, and John S. Lazo

### Molecular Pharmacology

|        |                                                                                                        |           |       |
|--------|--------------------------------------------------------------------------------------------------------|-----------|-------|
| ELOVL5 | ELOVL family member 5, elongation of long chain fatty acids (FEN1/Elo2, SUR4/Elo3-like, yeast)         | NM_021814 | 33.47 |
| CREBBP | CREB binding protein (Rubinstein-Taybi syndrome)                                                       | NM_004380 | 33.56 |
| PSMA5  | proteasome (prosome, macropain) subunit, alpha type, 5                                                 | NM_002790 | 33.87 |
| OSBP   | oxysterol binding protein                                                                              | NM_002556 | 33.91 |
| XRN2   | 5-3 exoribonuclease 2                                                                                  | NM_012255 | 34.12 |
| CHRNB1 | cholinergic receptor, nicotinic, beta polypeptide 1 (muscle)                                           | NM_000747 | 34.30 |
| PSMA2  | proteasome (prosome, macropain) subunit, alpha type, 2                                                 | NM_002787 | 34.50 |
| PSMA1  | proteasome (prosome, macropain) subunit, alpha type, 1                                                 | NM_148976 | 34.72 |
| CDK9   | cyclin-dependent kinase 9 (CDC2-related kinase)                                                        | NM_001261 | 34.79 |
| PCBD   | 6-pyruvoyl-tetrahydropterin synthase/dimerization cofactor of hepatocyte nuclear factor 1 alpha (TCF1) | NM_000281 | 34.79 |
| POLR2D | polymerase (RNA) II (DNA directed) polypeptide D                                                       | NM_004805 | 34.85 |
| MRGPRD | MAS-related GPR, member D                                                                              | NM_198923 | 35.06 |
| CHST5  | carbohydrate (N-acetylglucosamine 6-O) sulfotransferase 5                                              | NM_012126 | 35.07 |
| HYAL1  | hyaluronoglucosaminidase 1                                                                             | NM_153281 | 35.20 |
| PLSCR3 | phospholipid scramblase 3                                                                              | NM_020360 | 35.31 |
